# Supplementary material for: Perceptions about the relative importance of patient care-related topics: a single institutional survey of its anesthesiologists, nurse anesthetists, and surgeons
Source: Springer Nature journal article supplement (doi:10.1186/s12871-016-0187-0), 2015-12-01
Supplement: MOESM1 [file 9736620]

**Surveying the Clinical Practice Patterns within  
the UAB Department of Anesthesiology**

Qualitative PROMPT Survey – STUDY SURVEY ONE

Please answer the following questions:

What type of clinician are you?  Anesthesiologist  Surgeon  Nurse Anesthetist

How many years after completing your training have you been in clinical practice? \_\_\_\_\_ years

How old are you? \_\_\_\_\_ years

What is your gender?  Female  Male

What is your race?  African-American  Caucasian  Hispanic  Other

A Perioperative Risk Optimization and Management Planning Tool (PROMPT) is a local clinician-designed approach to promoting standardization of care, which accommodates patients' individual differences, respects care providers' clinical acumen, and keeps pace with the rapid growth of medical knowledge.

Please list up to 12 clinical care issues or medical conditions in surgical patients, which you feel are the most important topics for the development and implementation of a PROMPT here at UAB.

1. \_\_\_\_\_
2. \_\_\_\_\_
3. \_\_\_\_\_
4. \_\_\_\_\_
5. \_\_\_\_\_
6. \_\_\_\_\_
7. \_\_\_\_\_
8. \_\_\_\_\_
9. \_\_\_\_\_
10. \_\_\_\_\_
11. \_\_\_\_\_
12. \_\_\_\_\_
